# Supplementary material
Source: PubMed Central journal article supplement (PMC2287351)
Supplement: plntphys_pp.107.115188_1.pdf [file plntphys_pp.107.115188_1.pdf]

**Table S2.** *Genes and oligonucleotide sets used in quantitative and semi-quantitative RT-PCR experiments*

| <b>GenBank accession number</b> | <b>Gene product</b>                                 | <b>Primers (5' to 3')</b>                                    |
|---------------------------------|-----------------------------------------------------|--------------------------------------------------------------|
| AF272366                        | <i>Verticillium</i> wilt disease resistance protein | F: GTGGAGACAGGACGCAATCA<br>R: CAGCTCCATGCCTTTGATG            |
| AW219676                        | Wound-induced protein Sn-1                          | F: GGTGGAGATCTGTTAGAGTTGTACG<br>R: GAGAGGTTCTGGTGTGTCTTCAG   |
| AY359965                        | EIX receptor 1                                      | F: TCTCCCACTTCTCTAGACTTGTCAC<br>R: CAGCTAGACTTGTCATGTTTCATCC |
| AW032581                        | Knotted-1 transcription factor                      | F: ACTATGTTGTTGGTCAAAGTCAACG<br>R: ACGAACATGTTGTTGTAGTTGCTCT |
| AI776170                        | Cysteine protease                                   | F: CTCGACACTTCATTACTATCCCAG<br>R: CTCTCTTTCTCCAGTCCATGCTA    |
| AY093595                        | Osmotin-like protein                                | F: AGGCCAAACATGGGTCATC<br>R: CATGAACCTCTACCAGCACCA           |
| BG629373                        | Zeatin glucosyl transferase                         | F: CTCTGTCTCATCTCATCTCCTTCTG<br>R: ATTGGAGTAGAGTTGAGGGATTGG  |
| AJ133600                        | Extensin                                            | F: GGTCATGGCAAGAGAAGTCG<br>R: ACCACGGCCATTTCGATTG            |
| BG629612                        | Chitinase                                           | F: GCTACCAGCAGAGTATTGACATGG<br>R: GTGCACTCTCTACTGGCCTATTC    |
| CN385925                        | Patatin-like protein 3                              | F: ACTTCGATGTAGTAGCAGGAACAAG<br>R: AAAGGACGATTATCCTTGTTAGGAG |
| U89256                          | Pti5, ERF/AP2 transcription factor                  | F: GAGAGTATGGCTAGGTACGTTTCG<br>R: TAAGTAGTGCCTTAGCACCTCGC    |

|          |                                           |                                                              |
|----------|-------------------------------------------|--------------------------------------------------------------|
| AW622607 | Nitrate reductase                         | F: CCCTCTGAGGATCAAGTCTTAGG<br>R: CCCTACTTCATCGACTGTGCTAGT    |
| BF176599 | Proline-rich protein                      | F: GTGAAGCTAGTGTGCAACAACAC<br>R: CTGAGCTCAAGAGTTTAGGAAGGA    |
| BG630282 | Probable protein kinase                   | F: CGGTAAACCTTGTAGCTTAGTGTCG<br>R: GTAGCGCTGTTGATTCTCAGATAGG |
| AW647641 | Peroxidase                                | F: GTGCTCACACTATTGGAGTCTCTCT<br>R: TTCGCTGTCTAGAGATGGATCTTG  |
| K03291   | Wound-induced protease inhibitor II       | F: GCCAAGGCTTGTACTAGAGAATGT<br>R: TACAACCCTTATAGCCTGAGCAAC   |
| BT012691 | 2-oxoglutarate-dependent dioxygenase E8   | F: GATGTTCCCTCCTACTCATGGAGC<br>R: GCCAATACTCTGTGAACTACGC     |
| M69247   | Pathogenesis-related protein PR1a (P4)    | F: TATACTCAAGTAGTCTGGCGCAAC<br>R: CCTACAGGATCGTAGTTGCAAGA    |
| M69248   | Pathogenesis-related protein 6 (P6)       | F: TATACTCAAGTAGTCTGGCGCAAC<br>R: GCCTACAGGATCATAGTTGCAAGA   |
| U30465   | Chitinase class 2                         | F: GGGAGTGCAATAGGTGTGAATC<br>R: GTTGTGCTGTCATCCAGAACC        |
| Z15141   | Acidic 26 kDa endochitinase precursor     | F: GGTTCTGGATGACAGAACAGGA<br>R: GTACCCTGGA ACTCTATTAGCTGC    |
| BM956714 | Protease inhibitor/lipid transfer protein | F: GCAATCATCAAAGAAGCACA<br>R: GAAACAATGGCAACAATGGAG          |
| BT013355 | Pathogenesis-related protein 2 (P2)       | F: TTTACTGCGCTACCTGGGAT<br>R: ATCTACCGCATGAAGCTTGG           |

|          |               |                                                                               |
|----------|---------------|-------------------------------------------------------------------------------|
| U97257   | GAPDH         | F: ATGCTCCCATGTTTGTGTGGGTG<br>R: TTAGCCAAAGGTGCAAGGCAGTTC                     |
| X58273   | ACC oxidase 1 | F: GTATTCACAATATTCTATTTATTCAATACACTTAGG<br>R: GCAGCAAATCACAATCTTTTTTAATACTAAC |
| Y00478   | ACC oxidase 2 | F: CACACTATTTACTCTAAAAAAGAAAAAAAAAAG<br>R: ATGTATGTCAATAACAAATAATTTTTCTTCCAA  |
| Z54199   | ACC oxidase 3 | F: CACATCATATAATTTAATTACCAAGA<br>R: CAATCACACACACATACACCATC                   |
| AB013101 | ACC oxidase 4 | F: CCGGGCAGGTAGCAAATTTAAAAGAT<br>R: GTCCTATTTAAAACATAAAACAAATTCCCCC           |
| AJ715790 | ACC oxidase 5 | F: GGAGCTTTGAAGTGTGAGGGAG<br>R: CTTAGTACTAAACAATCTTTTCTTCCCATTC               |

---
