# Supplementary material
Source: PubMed Central journal article supplement (PMC2287351)
Supplement: plntphys_pp.107.115188_2.pdf [file plntphys_pp.107.115188_2.pdf]

**Table S3.** *Expected and observed frequencies of functional categories for Cmm-modulated genes*

The distribution in functional categories of annotated genes differentially expressed in response to *Cmm* was compared to that of the approximately 1,000 annotated tomato genes that are available from database. *P* values for differences in the percentage of each category were calculated using a two-sided binomial test followed by false discovery rate correction for multiple testing.

| Functional Category           | 4 dpi      |            |                      | 8 dpi      |                      |
|-------------------------------|------------|------------|----------------------|------------|----------------------|
|                               | Expected % | Observed % | <i>P</i> value       | Observed % | <i>P</i> value       |
| Defense                       | 6.5        | 20.5*      | $6.2 \times 10^{-3}$ | 19.0*      | $4.9 \times 10^{-6}$ |
| Transcription                 | 10.2       | 10.3       | 1                    | 11.4       | 0.71                 |
| Oxygen and radical metabolism | 2.5        | 10.3       | 0.03                 | 11.4*      | $2.0 \times 10^{-5}$ |
| Stress                        | 1.4        | 12.8*      | $4.5 \times 10^{-4}$ | 8.6*       | $3.7 \times 10^{-5}$ |
| Signaling                     | 6.3        | 2.6        | 0.57                 | 8.6        | 0.64                 |
| Protein degradation           | 6.9        | 12.8       | 0.25                 | 7.6        | 0.82                 |
| Hormone-related               | 1.2        | 10.3*      | $2.7 \times 10^{-3}$ | 6.7*       | $6.2 \times 10^{-4}$ |
| Protein synthesis             | 11.1       | 7.7        | 0.7                  | 5.7        | 0.1                  |
| Lipid metabolism              | 1.1        | 0          | 1                    | 4.8*       | 0.01                 |
| Cell wall-related             | 2.7        | 5.1        | 0.55                 | 3.8        | 0.59                 |
| Carbohydrate metabolism       | 10.7       | 2.6        | 0.13                 | 2.9*       | $7.0 \times 10^{-3}$ |
| Secondary metabolism          | 6.8        | 0          | 0.13                 | 2.9        | 0.15                 |
| Nucleic acid-related          | 3.9        | 2.6        | 1                    | 2.9        | 0.85                 |
| Transport                     | 8.6        | 2.6        | 0.28                 | 1.9*       | 0.01                 |

\*Significantly enriched percentages (*P* value < 0.05).
