# Supplementary material
Source: PubMed Central journal article supplement (PMC2287351)
Supplement: plntphys_pp.107.115188_3.pdf [file plntphys_pp.107.115188_3.pdf]

**Table S4.** Induction of defense-related genes in Rio Grande and Ailsa Craig tomato lines upon *Cmm* infection

| GenBank accession | Gene product                                        | Array ratio <sup>a</sup><br>Rio Grande<br>( <i>Cmm</i> /mock) | qRT-PCR ratio <sup>b</sup><br>Rio Grande<br>( <i>Cmm</i> /mock) | qRT-PCR ratio <sup>b</sup><br>Ailsa Craig<br>( <i>Cmm</i> /mock) |
|-------------------|-----------------------------------------------------|---------------------------------------------------------------|-----------------------------------------------------------------|------------------------------------------------------------------|
| U89256            | Pti5, ERF/AP2 transcription factor                  | 163                                                           | 193                                                             | 5                                                                |
| AF272366          | <i>Verticillium</i> wilt disease resistance protein | 88                                                            | 3                                                               | 2                                                                |
| AI776170          | Cysteine protease                                   | 81                                                            | 116                                                             | 8                                                                |
| AJ133600          | Extensin                                            | 20                                                            | 105                                                             | 94                                                               |
| BG629612          | Chitinase                                           | 55                                                            | 317                                                             | 15                                                               |
| AY359965          | EIX receptor 1                                      | 10                                                            | 9                                                               | 3                                                                |
| AW219676          | Wound induced protein Sn-1                          | 8                                                             | 21                                                              | 15                                                               |
| AY093595          | Osmotin-like protein                                | 10                                                            | 2                                                               | 4                                                                |
| CN385925          | Patatin-like protein 3                              | 5                                                             | 4                                                               | 2                                                                |
| M69248            | Pathogenesis-related protein 6 (P6)                 | 13                                                            | Not tested                                                      | 26                                                               |
| U30465            | Chitinase class 2                                   | 11                                                            | Not tested                                                      | 19                                                               |
| Z15141            | Endochitinase                                       | 10                                                            | Not tested                                                      | 16                                                               |
| BM956714          | Protease inhibitor/lipid transfer protein           | 6                                                             | Not tested                                                      | 5                                                                |
| K03291            | Wound-induced protease inhibitor II                 | 24                                                            | Not tested                                                      | 21                                                               |
| BT012691          | 2-oxoglutarate-dependent dioxygenase E8             | 22                                                            | Not tested                                                      | 8                                                                |
| M69247            | Pathogenesis-related protein PR1a (P4)              | 16                                                            | Not tested                                                      | 13                                                               |
| BT013355          | Pathogenesis-related protein 2 (P2)                 | 3                                                             | Not tested                                                      | 19                                                               |

<sup>a</sup>Ratio between expression in *Cmm*- and in mock-inoculated stems as estimated by microarray analysis at 8 dpi. Data represent the mean of two biological replicates.

<sup>b</sup>Ratio between expression in *Cmm*- and in mock-inoculated stems as estimated by qRT-PCR at 8 dpi. Data represent the mean of three and four biological replicates in Rio Grande and Ailsa Craig plants, respectively.
